# Supplementary material
Source: PubMed Central journal article supplement (PMC1409687)
Supplement: bj3950157add.pdf [file bj3950157add.pdf]

|                 | ka (1/Ms) | kd (1/s) | Rmax (RU) | RI (RU) | Conc of analyte | KA (1/M) | KD (M)   | Req (RU) | kobs (1/s) | Chi2   |
|-----------------|-----------|----------|-----------|---------|-----------------|----------|----------|----------|------------|--------|
| <b>YWWLTPPP</b> | 8.80E+04  | 1.30E-03 | 138       | 349     | 300n            | 6.76E+07 | 1.47E-08 | 13.1     | 0.0277     | 0.0488 |
| <b>p 3</b>      | 1.40E+04  | 4.12E-04 | 109       | 426     | 300n            | 3.39E+07 | 2.94E-08 | 98.5     | 4.61E-03   |        |
| <b>p 2</b>      | 5.00E+03  | 7.00E-04 | 174       | 304     | 300n            | 7.14E+06 | 1.40E-07 | 125      | 2.20E-03   |        |

**Table**

**A**

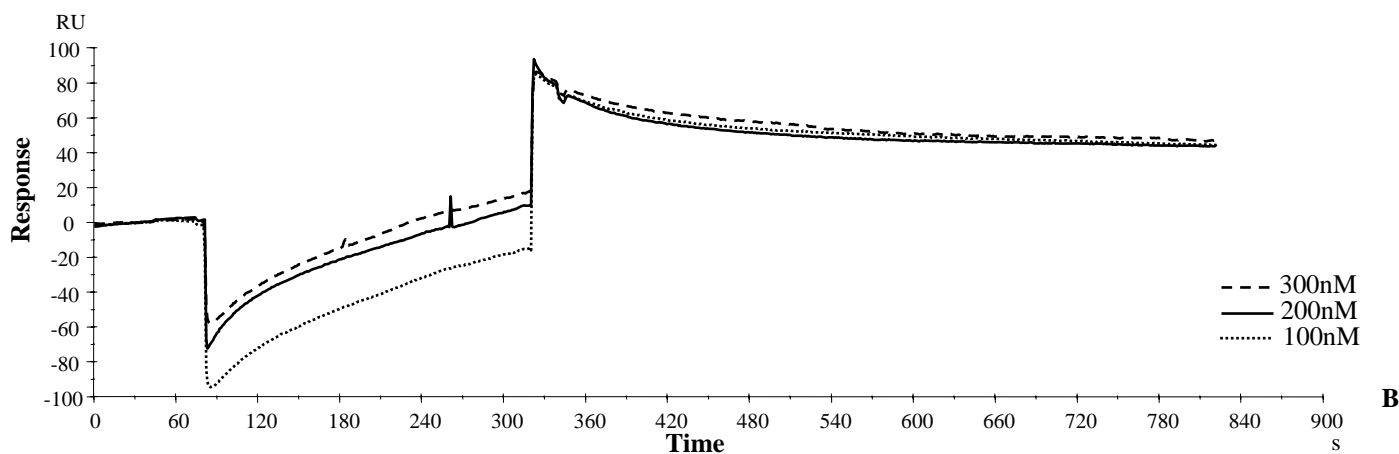

**B**

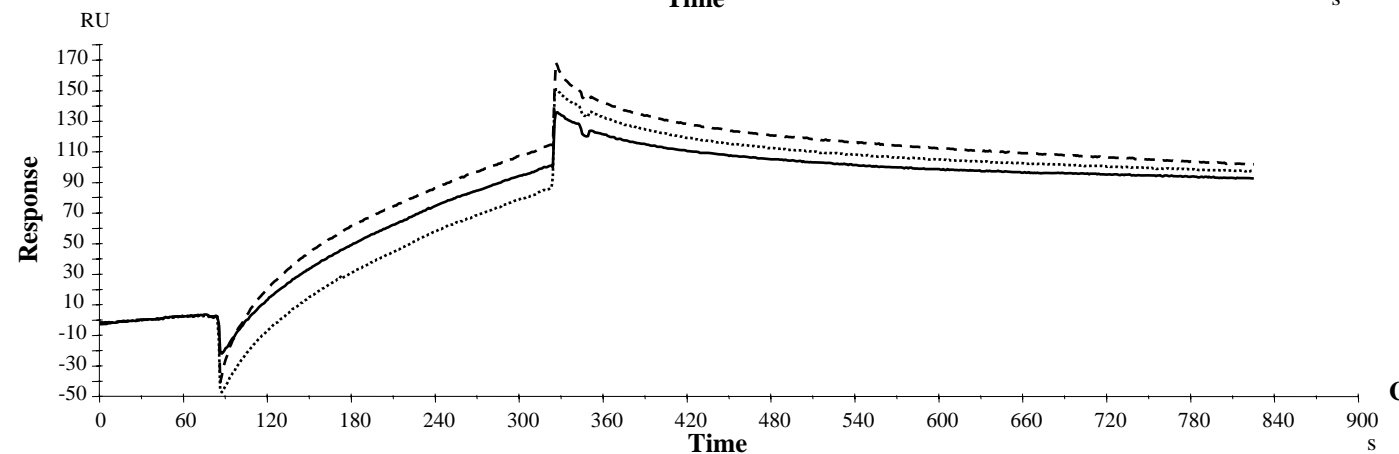

**C**

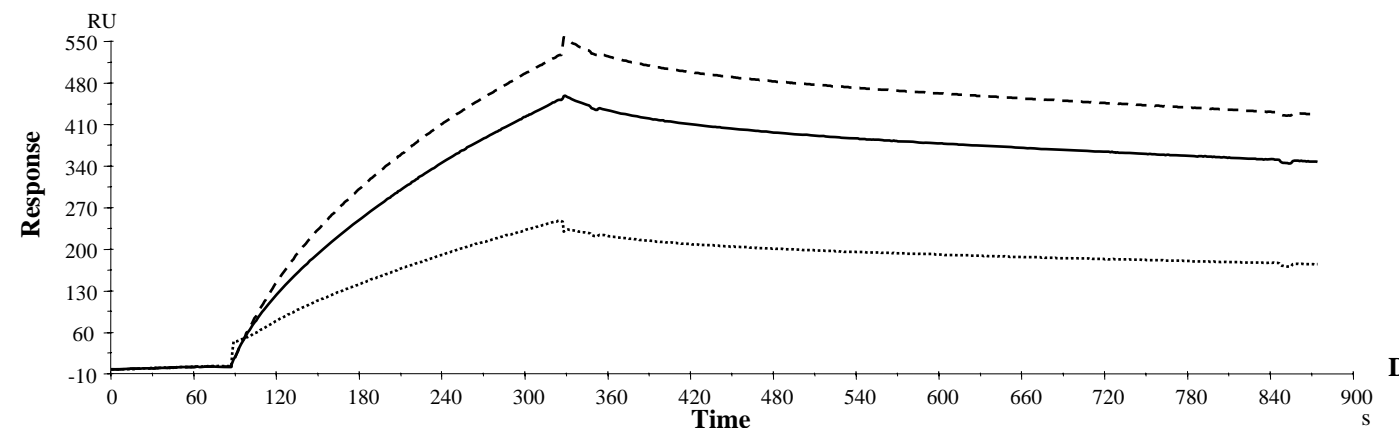

**D**

**Supplementary Figure 1.**

**A.** Table related to Biacore data shown in paper Figure 8. Fitting and statistics parameters were obtained by analysis of sensorgrams with BIAevaluation 3.0 software (BIAcore). Figure 8 illustrates overlay of bulk-subtracted sensorgrams obtained with 300nM PA63 on the three peptides.

PA63 in HEPES Buffer Saline (10mM HEPES, 150mM Na Cl, 3.4mM EDTA, 0.05% polysorbate 20, pH 7.4) (HBS), was injected at a flow rate of 10 $\mu$ l/min at three different concentrations (100nM  $\cdots$ , 200nM  $\text{—}$ , 300nM  $\text{-- --}$ ) over immobilized monomeric peptides, YWWLTPPP (**B**), p2 (**C**), p3 (**D**).
